# Supplementary material for: Investigating Perampanel Antiepileptic Drug by DFT Calculations and SERS with Custom Spinning Cell
Source: MDPI journal article supplement (doi:10.3390/molecules28165968), 2023-08-09
Supplement: s1 [file s1]

## ***Supplementary Information***

### **Investigating Perampanel antiepileptic drug by DFT calculations and SERS with custom spinning cell**

Nicolò Simone Villa <sup>1,†</sup>, Chiara Picarelli <sup>1,†</sup>, Federica Iacoe <sup>1</sup>, Chiara Giuseppina Zanchi <sup>1</sup>, Paolo M. Ossi <sup>2</sup>, Andrea Lucotti <sup>1</sup> and Matteo Tommasini <sup>1,\*</sup>

1 Department of Chemistry, Materials, and Chemical Engineering “G. Natta”, Politecnico di Milano, Piazza Leonardo da Vinci 32, 20133 Milano, Italy; nicolosimone.villa@polimi.it (N.S.V.); chiara.picarelli@polimi.it (C.P.); chiara.zanchi@tiscali.it (C.G.Z.); andrea.lucotti@polimi.it (A.L.)

2 Department of Energy, Politecnico di Milano, Piazza Leonardo da Vinci 32, 20133 Milano, Italy; paolo.ossi@polimi.it

\* Correspondence: matteo.tommasini@polimi.it

† These authors contributed equally to this work.

### **S1 Raman spectrum of the surface of the disk of the spinning cell**

The Raman spectrum of the surface of the disk of the spinning-cell where the SERS pads are deposited in the C1 configuration (see text) is reported in Fig. S1 (black) in comparison with a representative SERS spectrum of PER (red).

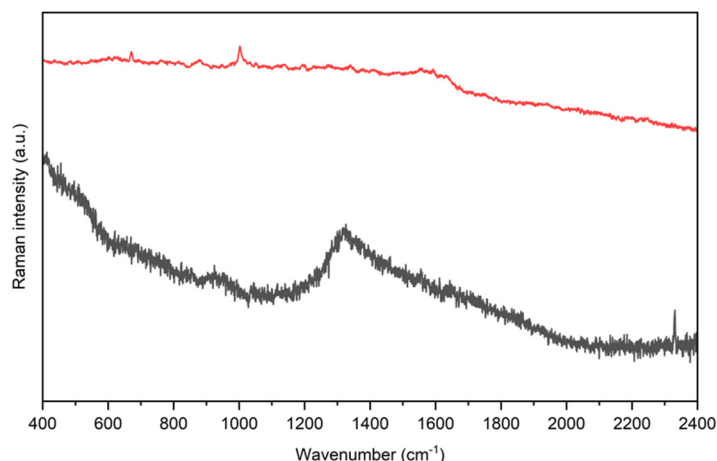

Figure S1. Comparison between the Raman spectrum of the surface of the disk of the spinning-cell (black), and a representative SERS spectrum of Perampanel (red).

### **S2 Main Raman peaks of Perampanel**

The Raman spectrum of Perampanel simulated by DFT methods is shown in Fig. S2 where it is compared with the experimental Raman spectrum recorded on a solid

sample of the drug in powder form (as received from *Cayman Chemical*). The assignment of the main Raman peaks is reported in Tab. S2.

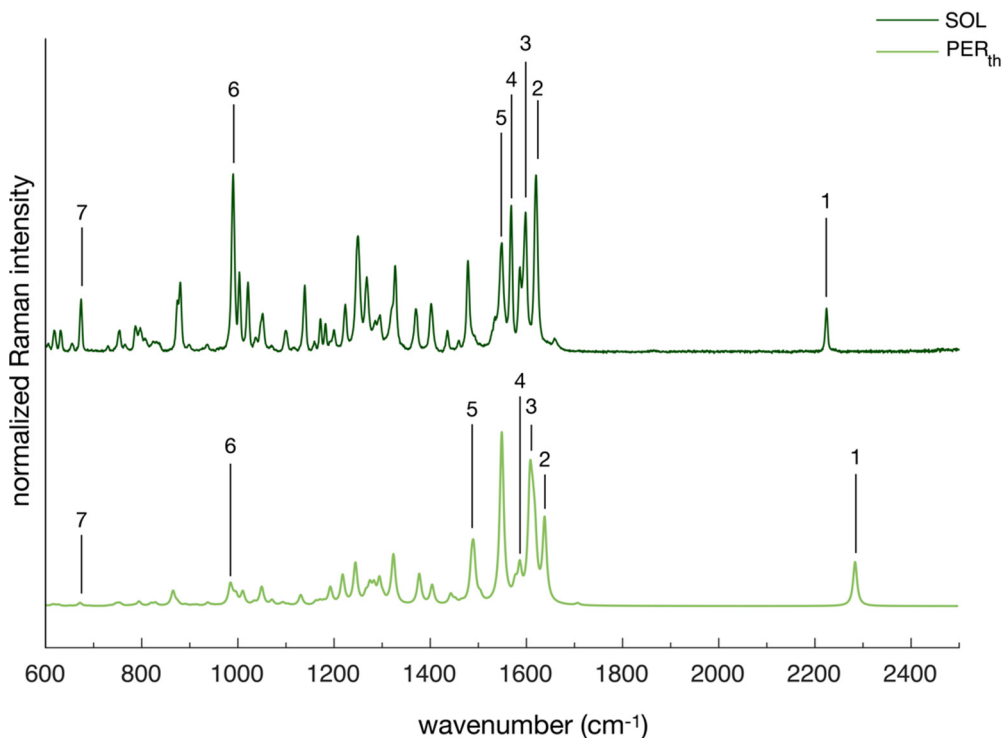

Figure S2. Comparison between the Raman spectrum of PER simulated by DFT (bottom), and the experimental Raman spectrum of Perampanel in solid form (top). The Raman spectrum was recorded with 785 nm excitation and 20x objective.

| Label      | Expt. wavenumber (cm <sup>-1</sup> ) | Assignment                |
|------------|--------------------------------------|---------------------------|
| 1          | 2231                                 | C≡N stretching            |
| 2, 3, 4, 5 | 1600, 1563, 1540, 1520               | Aromatic ring stretching  |
| 6          | 959                                  | Ring breathing            |
| 7          | 655                                  | Aromatic ring deformation |

Table S1. Assignment of the most relevant peaks of the experimental Raman spectrum of PER. The labels identify the Raman peaks in the spectra of Fig. S2.

By applying a scaling factor equal to 0.98 to the wavenumber axis of the calculated spectrum, one obtains a good agreement with the experimental spectrum of Perampanel, notably concerning the C≡N stretching, the aromatic ring stretching modes, and the ring breathing. The aromatic ring deformation mode is present in both spectra, but the predicted Raman intensity is too low compared with the experimental observation.

### **S3 Coordinates (Å) of the molecular models of Perampanel computed by DFT**

#### **Neutral PER**

| Atom | X        | Y        | Z        |
|------|----------|----------|----------|
| N    | 1.35499  | -0.75459 | 0.04170  |
| C    | 0.11046  | -1.45797 | -0.02531 |
| C    | -1.06547 | -0.59752 | -0.18275 |
| C    | -0.91621 | 0.76623  | -0.25961 |
| C    | 0.34575  | 1.41059  | -0.14806 |
| C    | 1.44785  | 0.60616  | -0.00961 |
| C    | -2.39917 | -1.24075 | -0.28056 |
| C    | -3.55299 | -0.68588 | 0.33470  |
| C    | -4.81180 | -1.29734 | 0.19278  |
| C    | -4.94702 | -2.46409 | -0.54830 |
| C    | -3.81879 | -3.02763 | -1.14746 |
| C    | -2.56953 | -2.42922 | -1.01040 |
| C    | -3.49762 | 0.49835  | 1.14362  |
| N    | -3.50237 | 1.46348  | 1.79517  |
| O    | 0.09857  | -2.68415 | 0.03571  |
| C    | 0.50272  | 2.88281  | -0.16511 |
| C    | -0.56222 | 3.74145  | 0.15633  |
| C    | -0.35190 | 5.11682  | 0.11634  |
| C    | 0.90936  | 5.60214  | -0.22525 |
| C    | 1.91313  | 4.67259  | -0.50005 |
| N    | 1.72717  | 3.35081  | -0.47943 |
| C    | 2.57626  | -1.51910 | 0.13023  |
| C    | 2.75043  | -2.46284 | 1.14570  |

|   |          |          |          |
|---|----------|----------|----------|
| C | 3.95561  | -3.15596 | 1.23342  |
| C | 4.98280  | -2.91229 | 0.31860  |
| C | 4.79965  | -1.97228 | -0.69486 |
| C | 3.59362  | -1.27780 | -0.79561 |
| H | -3.91012 | -3.94164 | -1.72654 |
| H | -5.92065 | -2.93224 | -0.65153 |
| H | -5.67054 | -0.84735 | 0.67943  |
| H | -1.70053 | -2.88747 | -1.46282 |
| H | -1.79186 | 1.37876  | -0.43709 |
| H | 2.44033  | 1.02883  | 0.07424  |
| H | 1.94858  | -2.65328 | 1.84746  |
| H | 4.09239  | -3.88844 | 2.02296  |
| H | 5.91940  | -3.45620 | 0.39427  |
| H | 5.58929  | -1.78139 | -1.41500 |
| H | 3.43665  | -0.55894 | -1.59368 |
| H | -1.52250 | 3.34412  | 0.46754  |
| H | -1.16095 | 5.79811  | 0.36278  |
| H | 1.11659  | 6.66624  | -0.26768 |
| H | 2.91735  | 5.00751  | -0.75466 |

**Protonated PER: H<sup>+</sup>PER<sub>N1</sub>**

| Atom | X         | Y         | Z         |
|------|-----------|-----------|-----------|
| N    | 1.290063  | -0.851321 | 0.012331  |
| C    | 0.004399  | -1.466191 | -0.128683 |
| C    | -1.110811 | -0.514212 | -0.213915 |
| C    | -0.867178 | 0.850651  | -0.255238 |
| C    | 0.429305  | 1.390789  | -0.153066 |

|   |           |           |           |
|---|-----------|-----------|-----------|
| C | 1.469360  | 0.489150  | 0.003471  |
| C | -2.469178 | -1.051000 | -0.290517 |
| C | -3.569189 | -0.413375 | 0.382797  |
| C | -4.920007 | -0.847949 | 0.216745  |
| C | -5.174565 | -1.946376 | -0.571700 |
| C | -4.100554 | -2.624809 | -1.181189 |
| C | -2.785054 | -2.199881 | -1.035971 |
| C | -3.341996 | 0.552455  | 1.346571  |
| N | -3.214774 | 1.234642  | 2.295300  |
| O | -0.101030 | -2.684049 | -0.151304 |
| C | 0.733865  | 2.843874  | -0.199102 |
| C | -0.163745 | 3.787047  | -0.720079 |
| C | 0.199616  | 5.132562  | -0.720312 |
| C | 1.444195  | 5.498469  | -0.213088 |
| C | 2.279706  | 4.487270  | 0.265869  |
| N | 1.941102  | 3.196086  | 0.279444  |
| C | 2.458389  | -1.709166 | 0.083380  |
| C | 2.569619  | -2.653850 | 1.104619  |
| C | 3.718424  | -3.438455 | 1.176462  |
| C | 4.741758  | -3.281383 | 0.238486  |
| C | 4.616187  | -2.337880 | -0.781083 |
| C | 3.468720  | -1.549029 | -0.865940 |
| H | -4.304518 | -3.497760 | -1.793410 |
| H | -6.192026 | -2.295297 | -0.707465 |
| H | -5.719294 | -0.327371 | 0.732723  |
| H | -1.981663 | -2.742034 | -1.515276 |
| H | -1.704880 | 1.526842  | -0.403438 |

|   |           |           |           |
|---|-----------|-----------|-----------|
| H | 2.484920  | 0.846215  | 0.121245  |
| H | 1.771168  | -2.773694 | 1.826858  |
| H | 3.814327  | -4.173053 | 1.969278  |
| H | 5.633369  | -3.896818 | 0.301049  |
| H | 5.404682  | -2.217588 | -1.516680 |
| H | 3.353432  | -0.827015 | -1.668411 |
| H | -1.113283 | 3.483944  | -1.149095 |
| H | -0.475821 | 5.880685  | -1.123767 |
| H | 1.767427  | 6.533429  | -0.196901 |
| H | 3.265493  | 4.725554  | 0.658800  |
| H | -3.097434 | 2.178231  | 2.634298  |

**Protonated PER: H<sup>+</sup>PER<sub>N2</sub>**

| Atom | X         | Y         | Z         |
|------|-----------|-----------|-----------|
| N    | 1.460508  | -0.615411 | -0.033513 |
| C    | 0.291639  | -1.467441 | -0.116587 |
| C    | -0.983237 | -0.751246 | -0.292187 |
| C    | -0.983426 | 0.609981  | -0.409508 |
| C    | 0.202850  | 1.398461  | -0.275972 |
| C    | 1.398292  | 0.732509  | -0.083097 |
| C    | -2.243207 | -1.534569 | -0.314926 |
| C    | -3.419428 | -1.057624 | 0.329854  |
| C    | -4.607588 | -1.804568 | 0.299564  |
| C    | -4.649132 | -3.025752 | -0.365371 |
| C    | -3.502108 | -3.505257 | -0.997873 |
| C    | -2.315791 | -2.773701 | -0.966800 |
| C    | -3.431944 | 0.189158  | 1.039441  |

|   |           |           |           |
|---|-----------|-----------|-----------|
| N | -3.434250 | 1.221271  | 1.578974  |
| O | 0.432557  | -2.673015 | -0.045574 |
| C | 0.108159  | 2.846760  | -0.206822 |
| C | -1.000800 | 3.526929  | 0.330461  |
| C | -1.002552 | 4.911853  | 0.397482  |
| C | 0.100340  | 5.655342  | -0.062601 |
| C | 1.172090  | 4.976058  | -0.590062 |
| N | 1.141417  | 3.618868  | -0.657597 |
| C | 2.757384  | -1.244001 | 0.123431  |
| C | 3.015311  | -2.051692 | 1.232330  |
| C | 4.282248  | -2.612366 | 1.377761  |
| C | 5.277232  | -2.370055 | 0.427094  |
| C | 5.005545  | -1.567245 | -0.680680 |
| C | 3.739056  | -1.003534 | -0.839523 |
| H | -3.525848 | -4.457586 | -1.517603 |
| H | -5.569447 | -3.599689 | -0.384219 |
| H | -5.486038 | -1.420320 | 0.806308  |
| H | -1.430567 | -3.168760 | -1.446908 |
| H | -1.912544 | 1.123209  | -0.619151 |
| H | 2.339524  | 1.239210  | 0.104235  |
| H | 2.237924  | -2.240791 | 1.962812  |
| H | 4.491863  | -3.240525 | 2.237209  |
| H | 6.260459  | -2.813179 | 0.547199  |
| H | 5.771126  | -1.388197 | -1.428512 |
| H | 3.506633  | -0.405875 | -1.716095 |
| H | -1.828103 | 2.951862  | 0.736090  |
| H | -1.856777 | 5.423263  | 0.829212  |

|   |          |          |           |
|---|----------|----------|-----------|
| H | 0.119445 | 6.736761 | -0.010150 |
| H | 2.061342 | 5.455786 | -0.979825 |
| H | 1.921221 | 3.147841 | -1.103501 |

**Protonated PER: H<sup>+</sup>PER<sub>N3</sub>**

| Atom | X         | Y         | Z         |
|------|-----------|-----------|-----------|
| N    | 0.211375  | -1.620365 | -1.172073 |
| C    | -1.090865 | -0.719067 | -1.287009 |
| C    | -0.965981 | 0.600441  | -0.683200 |
| C    | 0.280211  | 1.080053  | -0.406079 |
| C    | 1.524601  | 0.340748  | -0.571790 |
| C    | 1.493699  | -0.949907 | -0.947907 |
| C    | -2.206405 | 1.374595  | -0.424992 |
| C    | -2.386977 | 2.035460  | 0.819961  |
| C    | -3.551755 | 2.775847  | 1.067595  |
| C    | -4.541819 | 2.866528  | 0.092599  |
| C    | -4.376107 | 2.213606  | -1.128925 |
| C    | -3.223277 | 1.470872  | -1.383095 |
| C    | -1.398232 | 1.929139  | 1.853719  |
| N    | -0.572677 | 1.833752  | 2.668911  |
| O    | -2.001824 | -1.246158 | -1.852397 |
| C    | 2.840422  | 0.992164  | -0.324252 |
| C    | 2.970861  | 2.126569  | 0.484741  |
| C    | 4.247171  | 2.658865  | 0.677966  |
| C    | 5.334142  | 2.044678  | 0.065322  |
| C    | 5.102736  | 0.901975  | -0.709020 |
| N    | 3.890586  | 0.382653  | -0.903568 |



|   |           |           |           |
|---|-----------|-----------|-----------|
| C | -0.047234 | -2.716566 | -0.172829 |
| C | 0.073703  | -2.435822 | 1.185422  |
| C | -0.198871 | -3.460658 | 2.091435  |
| C | -0.580333 | -4.724718 | 1.635431  |
| C | -0.698487 | -4.975048 | 0.267538  |
| C | -0.434862 | -3.961870 | -0.655326 |
| H | -5.145342 | 2.281298  | -1.891038 |
| H | -5.440504 | 3.441169  | 0.289511  |
| H | -3.672791 | 3.266191  | 2.027130  |
| H | -3.110211 | 0.969418  | -2.336396 |
| H | 0.358563  | 2.103746  | -0.062723 |
| H | 2.369220  | -1.573860 | -1.067870 |
| H | 0.371222  | -1.453622 | 1.536338  |
| H | -0.110640 | -3.266359 | 3.154866  |
| H | -0.785985 | -5.516146 | 2.348329  |
| H | -0.995269 | -5.955935 | -0.087597 |
| H | -0.535455 | -4.147705 | -1.720850 |
| H | 2.119450  | 2.568543  | 0.990402  |
| H | 4.382864  | 3.534983  | 1.303594  |
| H | 6.340905  | 2.429920  | 0.184032  |
| H | 5.928166  | 0.387497  | -1.194920 |
| H | 0.237358  | -2.079454 | -2.090357 |

**Protonated PER: H<sup>+</sup>PER<sub>o</sub>**

| Atom | X        | Y         | Z         |
|------|----------|-----------|-----------|
| N    | 1.270220 | -0.777954 | -0.028307 |
| C    | 0.020521 | -1.322658 | -0.098635 |

|   |           |           |           |
|---|-----------|-----------|-----------|
| C | -1.105827 | -0.487820 | -0.248836 |
| C | -0.875180 | 0.884436  | -0.306889 |
| C | 0.411934  | 1.445872  | -0.197754 |
| C | 1.472480  | 0.571570  | -0.073575 |
| C | -2.479137 | -1.056746 | -0.319256 |
| C | -3.523301 | -0.525131 | 0.480661  |
| C | -4.821170 | -1.051573 | 0.394627  |
| C | -5.094855 | -2.097457 | -0.481890 |
| C | -4.074720 | -2.623286 | -1.275029 |
| C | -2.781157 | -2.110014 | -1.190292 |
| C | -3.275194 | 0.551300  | 1.395887  |
| N | -3.062287 | 1.442552  | 2.113272  |
| O | -0.121112 | -2.640606 | -0.025243 |
| C | 0.677275  | 2.907444  | -0.224480 |
| C | -0.310216 | 3.844821  | 0.098837  |
| C | 0.023432  | 5.198407  | 0.051029  |
| C | 1.319009  | 5.562353  | -0.305785 |
| C | 2.240821  | 4.549517  | -0.586674 |
| N | 1.936377  | 3.250679  | -0.549053 |
| C | 2.425830  | -1.660177 | 0.118883  |
| C | 2.771041  | -2.118290 | 1.393867  |
| C | 3.887513  | -2.945384 | 1.527133  |
| C | 4.638645  | -3.296261 | 0.403229  |
| C | 4.280039  | -2.826923 | -0.862870 |
| C | 3.164699  | -2.003137 | -1.015929 |
| H | -4.284053 | -3.434388 | -1.964620 |
| H | -6.100620 | -2.498854 | -0.544809 |

|   |           |           |           |
|---|-----------|-----------|-----------|
| H | -5.602234 | -0.634887 | 1.020785  |
| H | -1.999829 | -2.526787 | -1.815365 |
| H | -1.723524 | 1.539720  | -0.459730 |
| H | 2.496900  | 0.913495  | -0.014004 |
| H | 2.188308  | -1.821617 | 2.260459  |
| H | 4.171920  | -3.305690 | 2.509931  |
| H | 5.508055  | -3.935757 | 0.514451  |
| H | 4.867724  | -3.098836 | -1.733117 |
| H | 2.875309  | -1.627995 | -1.992313 |
| H | -1.300133 | 3.536041  | 0.417819  |
| H | -0.716945 | 5.951802  | 0.299611  |
| H | 1.618544  | 6.603426  | -0.356297 |
| H | 3.265977  | 4.793759  | -0.854139 |
| H | 0.738441  | -3.080708 | 0.104349  |

Table S2. Coordinates (Å) of the molecular models of Perampanel by DFT of neutral PER and protonated PER: H<sup>+</sup>PER<sub>N1</sub>, H<sup>+</sup>PER<sub>N2</sub>, H<sup>+</sup>PER<sub>N3</sub>, H<sup>+</sup>PER<sub>O</sub>.

## S4 Statistical analysis

| Configuration       | N of Measurements | Peak (cm <sup>-1</sup> ) | Average | St.Dev | Relative Error |
|---------------------|-------------------|--------------------------|---------|--------|----------------|
| Static              | 12                | 670                      | 67.85   | 21.53  | 0.317          |
|                     |                   | 1001                     | 102.2   | 22.00  | 0.215          |
|                     |                   |                          |         |        |                |
| Static (Normalized) | 12                | 670                      | 0.033   | 0.016  | 0.476          |
|                     |                   | 1001                     | 0.049   | 0.019  | 0.380          |
|                     |                   |                          |         |        |                |
| C1                  | 8                 | 670                      | 487.8   | 38.49  | 0.079          |
|                     |                   | 1001                     | 359.5   | 38.22  | 0.106          |
|                     |                   |                          |         |        |                |
| C1 (Normalized)     | 8                 | 670                      | 0.252   | 0.024  | 0.096          |
|                     |                   | 1001                     | 0.185   | 0.008  | 0.046          |
|                     |                   |                          |         |        |                |
| C2                  | 12                | 670                      | 82.68   | 11.41  | 0.138          |
|                     |                   | 1001                     | 98.66   | 13.02  | 0.132          |
|                     |                   |                          |         |        |                |
| C2 (Normalized)     | 12                | 670                      | 0.053   | 0.002  | 0.033          |
|                     |                   | 1001                     | 0.063   | 0.002  | 0.026          |
|                     |                   |                          |         |        |                |

Table S3. Average peak height (from baseline), standard deviation, and relative error of the SERS measurements in static, C1, and C2 configurations. See the main text for details about the reported normalized data.
